# Supplementary material for: How many single-copy orthologous genes from whole genomes reveal deep gastropod relationships?
Source: PeerJ journal article supplement (doi:10.7717/peerj.13285), 2022-04-18

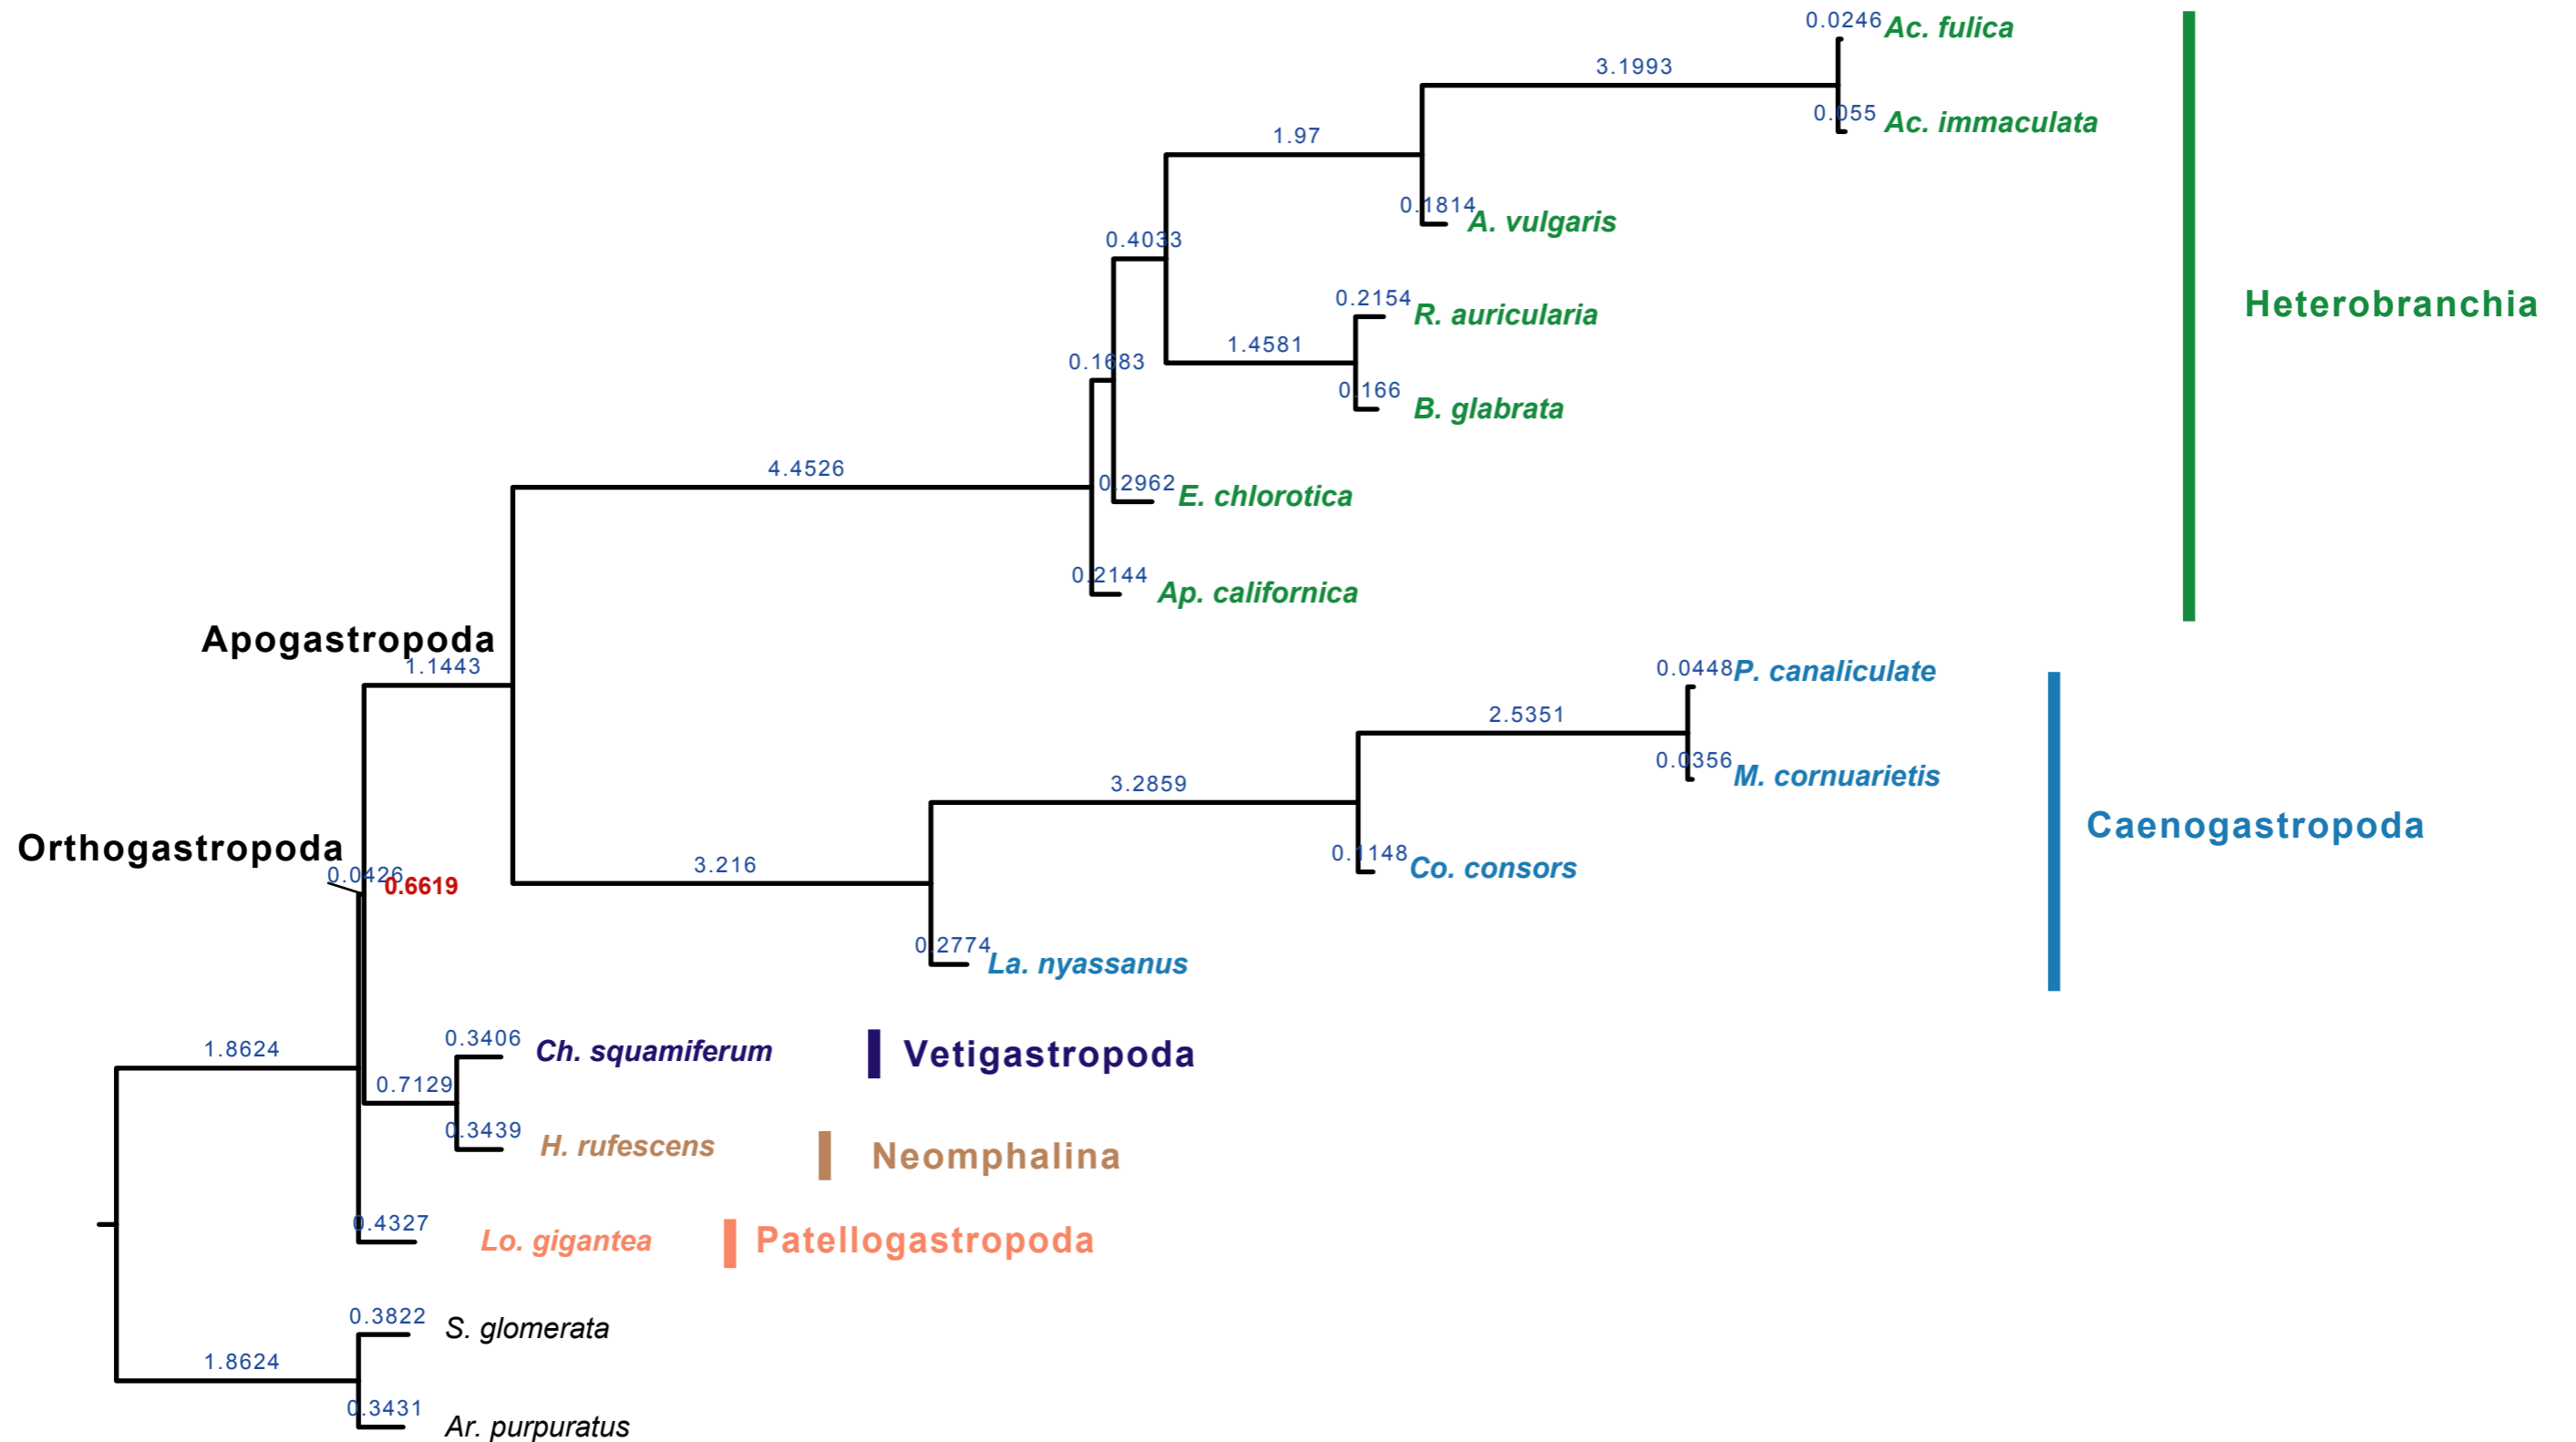

Supplement: Fig_S1.pdf [file Fig_S1.pdf]
