# Supplementary material for: How many single-copy orthologous genes from whole genomes reveal deep gastropod relationships?
Source: PeerJ journal article supplement (doi:10.7717/peerj.13285), 2022-04-18
Supplement: Fig_S4.pdf [file Fig_S4.pdf]

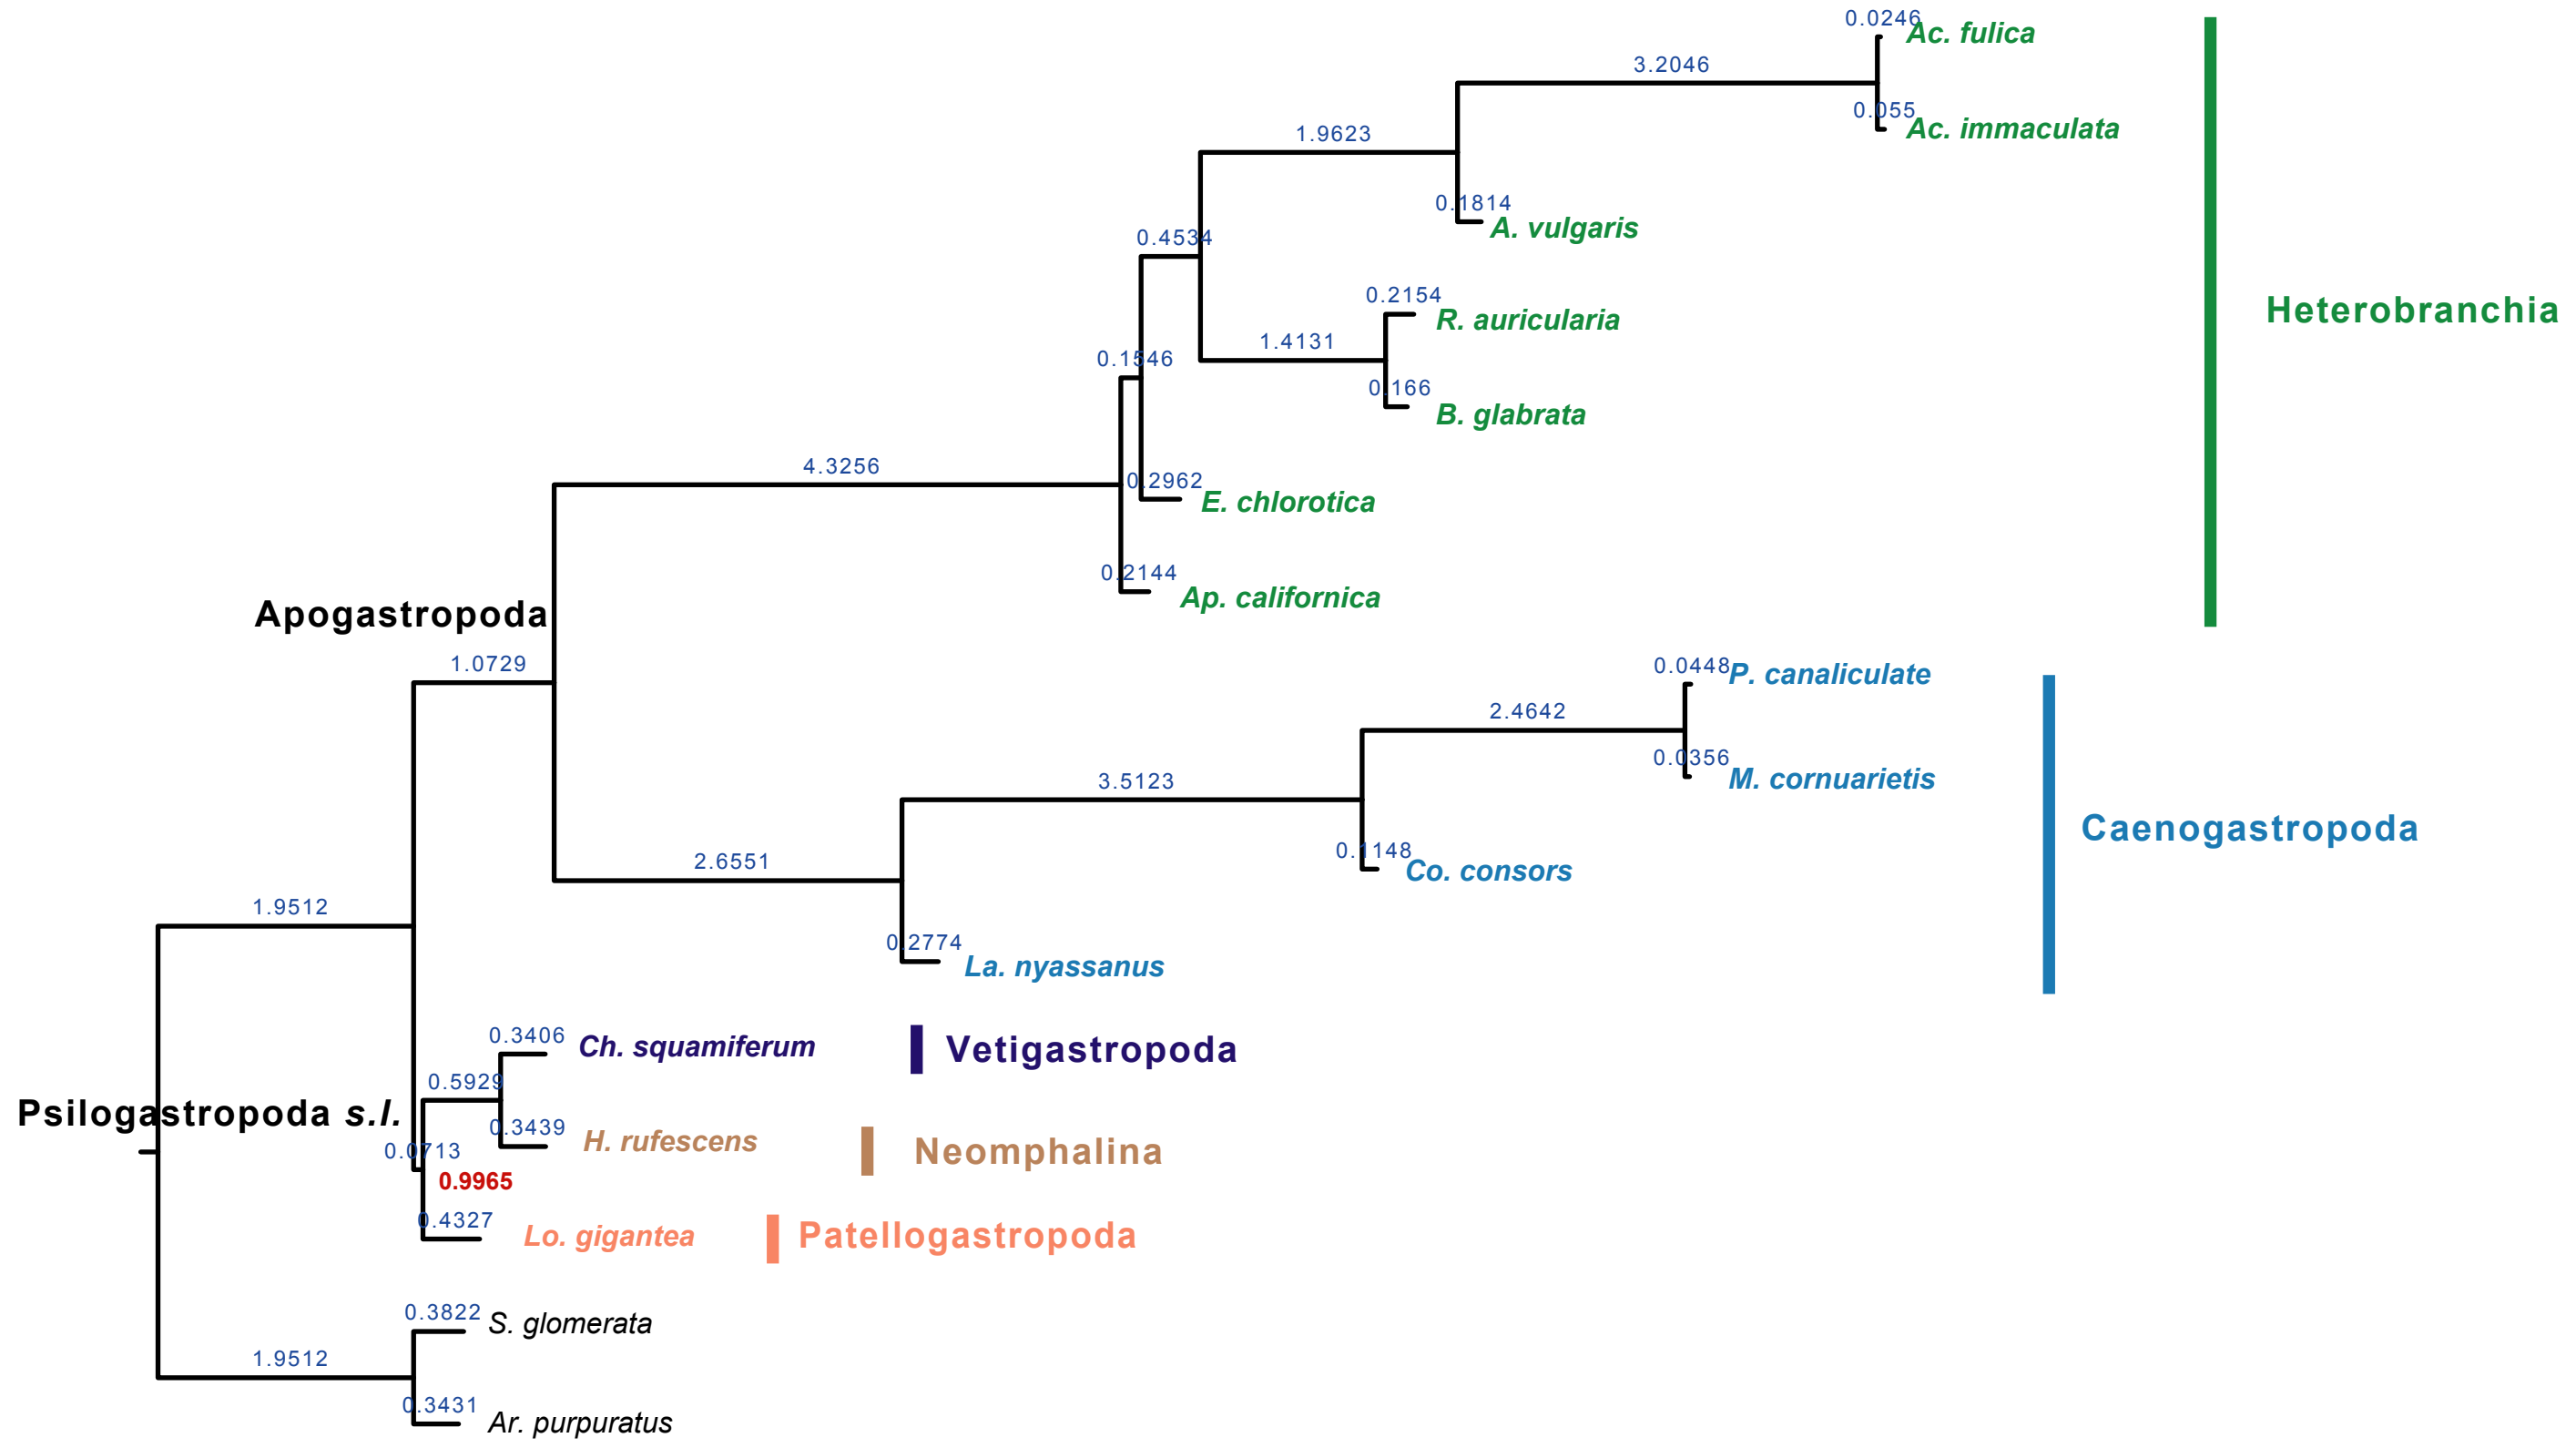

**Psilogastropoda s.l.**

**Apogastropoda**

**Caenogastropoda**

**Heterobranchia**

**Vetigastropoda**

**Neomphalina**

**Patellogastropoda**

1.9512

1.0729

2.6551

4.3256

3.5123

0.2774

0.5929

0.0713

0.4327

0.3822

0.3431

0.3406

0.3439

0.9965

0.2144

0.1346

0.4534

0.2962

1.4131

0.2154

0.166

0.1814

1.9623

3.2046

0.0246

0.055

2.4642

0.0448

0.0356

2.0
